# Supplementary material for: Steam-Exploded Pruning Waste as Peat Substitute: Physiochemical Properties, Phytotoxicity and Their Implications for Plant Cultivation
Source: MDPI journal article supplement (doi:10.3390/ijerph19095328), 2022-04-27
Supplement: s1 [file s1]

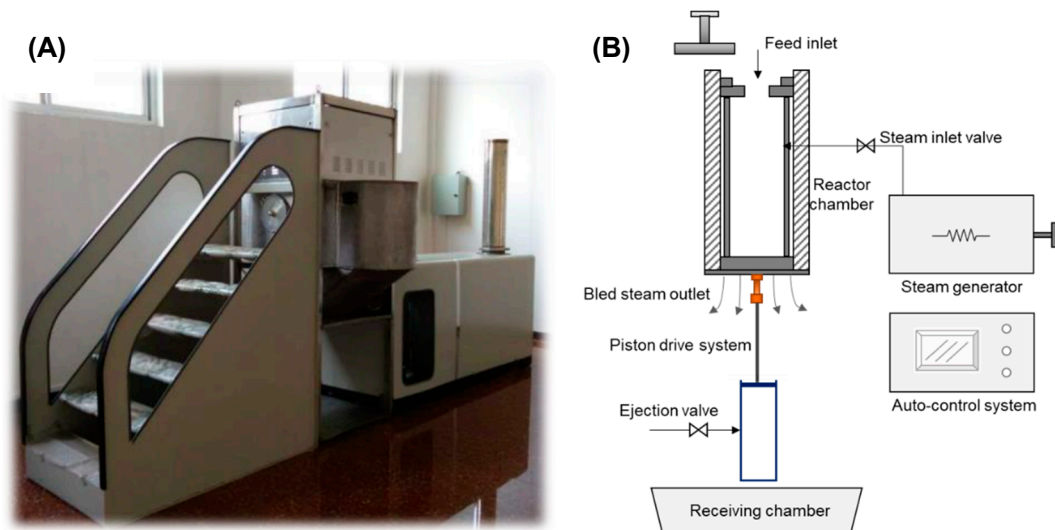

**Figure S1** Image (A) and schematic diagram (B) of the instant catapult steam explosion (ICSE) apparatus

**Table S1** Temperature, pressure, retention time, and pretreatment severity (LogR<sub>0</sub>) of steam explosion treatments evaluated in this study

| Temperature | Pressure | Time | LogR <sub>0</sub> <sup>a</sup> |
|-------------|----------|------|--------------------------------|
| °C          | MPa      | Min  |                                |
| 160         | 0.6      | 1    | 1.77                           |
|             |          | 3    | 2.24                           |
|             |          | 5    | 2.47                           |
| 175         | 0.9      | 1    | 2.21                           |
|             |          | 3    | 2.69                           |
|             |          | 5    | 2.91                           |
| 190         | 1.3      | 1    | 2.65                           |
|             |          | 3    | 3.13                           |
|             |          | 5    | 3.35                           |
| 205         | 1.7      | 1    | 3.09                           |
|             |          | 3    | 3.57                           |
|             |          | 5    | 3.79                           |
| 220         | 2.3      | 1    | 3.53                           |
|             |          | 3    | 4.01                           |
|             |          | 5    | 4.23                           |

<sup>a</sup> Pretreatment severity (LogR<sub>0</sub>) is defined as  $\log R_0 = \log (t \times e^{\frac{T-100}{14.75}})$ , where t is the pretreatment time in minutes and T is the pretreatment temperature in degrees Celsius.

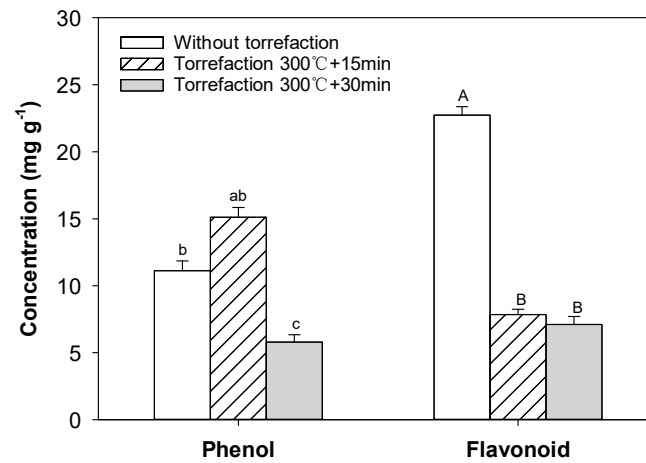

**Figure S2** Concentration total phenol and total flavonoid in pruning waste treated by steam explosion at 160°C+3 min with and without torrefaction. Data represents mean  $\pm$  SE. Different lower-case and upper-case letters indicate significant differences among treatments for phenol and flavonoid, respectively, at  $\alpha=0.05$ .
